# Supplementary material for: Intramuscular versus intravenous oxytocin to prevent postpartum haemorrhage at vaginal delivery: randomised controlled trial
Source: PubMed Central journal article supplement — BMJ. 2018 Sep 4;362:k3546. doi: 10.1136/bmj.k3546 (PMC6122278; doi:10.1136/bmj.k3546), 2018-09-04
Supplement: adnn044077.wt1.pdf [file adnn044077.wt1.pdf]

## Supplementary Table 1

### Baseline characteristics and delivery variables based on *per protocol* analyses

|                                             | Oxytocin IV<br>N= 493 | Oxytocin IM<br>N= 507 |
|---------------------------------------------|-----------------------|-----------------------|
| Maternal age $\geq$ 35 years (%)            | 145 (29.4)            | 143 (28.2)            |
| Obese (BMI $\geq$ 30.0) (%) *               | 59 (12.0)             | 69 (13.6)             |
| Nulliparous (%)                             | 241 (48.9)            | 243 (47.9)            |
| Parity 1-3 (%)                              | 252 (51.1)            | 264 (52.1)            |
| Parity $\geq$ 4 (%)                         | 0 (0.0)               | 0 (0.0)               |
| Previous caesarean section (%)              | 22 (4.5)              | 23 (4.5)              |
| Hb < 10.5g/dL pre-delivery (%) <sup>†</sup> | 31 (6.9)              | 32 (7.0)              |
| Iron supplements taken (%)                  | 320 (64.9)            | 336 (66.3)            |
| Induction of labour (%)                     | 263 (53.3)            | 271 (53.5)            |
| Augmentation with oxytocin (%)              | 177 (35.9)            | 168 (33.1)            |
| Epidural analgesia (%)                      | 348 (70.6)            | 349 (68.8)            |
| Prolonged labour > 12 hours (%)             | 31 (6.3)              | 29 (5.7)              |
| Pyrexia in labour (%) <sup>‡</sup>          | 18 (3.7)              | 12 (2.4)              |
| Spontaneous vaginal delivery                | 332 (67.3)            | 356 (70.2)            |
| Operative vaginal delivery                  | 161 (32.6)            | 141 (29.8)            |
| Episiotomy                                  | 166 (33.7)            | 157 (31.0)            |
| Second degree perineal tear                 | 183 (37.1)            | 175 (34.5)            |
| Third/Fourth degree perineal tear           | 20 (4.1)              | 23 (4.5)              |
| Male Infant (%)                             | 259 (52.5)            | 259 (51.1)            |
| Birth weight $\geq$ 4.0 kg (%)              | 75 (15.2)             | 72 (14.2)             |

\* BMI, body mass index is the weight in kilograms divided by the square of the height in metres

<sup>†</sup> Hb, haemoglobin; blood tests performed N=405 IV and N=410 IM

<sup>‡</sup> Temperature  $\geq$  38.0°C or  $\geq$  37.5°C x2

**Supplementary Table 2 Postpartum Haemorrhage – primary and secondary outcomes based on *per protocol* analyses**

|                                                                      | Oxytocin IV<br>N=493 | Oxytocin IM<br>N=507 | Adjusted OR (95% CI)<br>or<br>Mean difference (95% CI) | p value | NNT ‡ (95% CI) |
|----------------------------------------------------------------------|----------------------|----------------------|--------------------------------------------------------|---------|----------------|
| Postpartum Haemorrhage (%)<br>(PPH, blood loss $\geq$ 500mL)         | 97 (19.7)            | 120 (23.7)           | 0.68 (0.46 to 1.00)                                    | 0.05    | —              |
| Severe postpartum haemorrhage (%)<br>(PPH, blood loss $\geq$ 1000mL) | 19 (3.9)             | 37 (7.3)             | 0.53 (0.31 to 0.91)                                    | 0.019   | 30 (16 to 163) |
| Mean blood loss in mL (SD)                                           | 385 (327)            | 445 (411)            | 60 (13 to 106)                                         | 0.005   | —              |
| Need for blood transfusion (%)                                       | 8 (1.6)              | 22 (4.3)             | 0.37 (0.17 to 0.83)                                    | 0.012   | 37 (21 to 161) |

‡ NNT, number needed to treat

Adjusted Odds Ratio (95% Confidence Interval) for parity and OVD

**Supplementary Table 3      Secondary outcomes - third stage complications based on *per protocol* analyses**

|                                               | Oxytocin IV<br>N=493 | Oxytocin IM<br>N=507 | Adjusted OR (95% CI)<br>or<br>Mean difference (95% CI) | p value |
|-----------------------------------------------|----------------------|----------------------|--------------------------------------------------------|---------|
| Side effects to oxytocin (%) †                | 19 (3.9)             | 27 (5.3)             | 0.72 (0.41 to 1.28)                                    | 0.27    |
| Additional uterotonic agent (%) <sup>II</sup> | 123 (24.9)           | 139 (27.4)           | 0.91 (0.74 to 1.12)                                    | 0.38    |
| Additional surgical procedure (%) ‡           | 20 (4.1)             | 28 (5.5)             | 0.73 (0.42 to 1.29)                                    | 0.28    |
| Transfer to High Dependency unit (%)          | 9 (1.8)              | 19 (3.7)             | 0.49 (0.22 to 1.07)                                    | 0.07    |
| Prolonged hospitalisation (> 3 days) (%)      | 46 (9.3)             | 40 (7.9)             | 1.18 (0.79 to 1.77)                                    | 0.42    |
| Breast feeding initiation                     | 299 (60.6)           | 301 (59.4)           | 1.02 (0.92 to 1.13)                                    | 0.68    |
| Breast feeding at discharge                   | 275 (55.8)           | 275 (54.2)           | 1.03 (0.92 to 1.15)                                    | 0.62    |
| Hospital readmission                          | 4 (0.8)              | 5 (1.0)              | 0.82 (0.22 to 3.05)                                    | 0.77    |
| Hb fall ≥20% pre / post-delivery (%) *        | 95 (23.5)            | 101 (24.6)           | 0.95 (0.75 to 1.22)                                    | 0.69    |
| Mean Hb g/dL fall post-delivery (SD)          | 1.68 (1.42)          | 1.80 (1.48)          | 0.11 (-0.09 to 0.32)                                   | 0.29    |
| Mean Hct fall post-delivery (SD)              | 0.047 (0.042)        | 0.050 (0.045)        | 0.003 (-0.003 to 0.009)                                | 0.32    |

† Nausea, vomiting, hypotension, tachycardia      <sup>II</sup> Oxytocin infusion, ergometrine, misoprostol, carboprost

‡ Manual removal of placenta, examination under anaesthesia, Rusch balloon tamponade

\* A total of 405 in the IV group and 410 in the IM group had paired blood tests reflecting early discharges in advance of testing

**Supplementary Table 4 Subgroup analysis *per protocol* of PPH and severe PPH by parity and onset of labour**

|                              | Oxytocin IV | Oxytocin IM | Adjusted OR (95% CI) | p value |
|------------------------------|-------------|-------------|----------------------|---------|
| <b>Nulliparous</b>           | N=241       | N=243       |                      |         |
| PPH $\geq$ 500mL (%)         | 60 (24.9)   | 80 (32.9)   | 0.68 (0.46 to 1.00)  | 0.05    |
| Severe PPH $\geq$ 1000mL (%) | 11 (4.6)    | 29 (11.9)   | 0.35 (0.17 to 0.72)  | 0.005   |
| <b>Multiparous</b>           | N=252       | N=264       |                      |         |
| PPH $\geq$ 500mL (%)         | 37 (14.7)   | 40 (15.2)   | 0.96 (0.59 to 1.57)  | 0.88    |
| Severe PPH $\geq$ 1000mL (%) | 8 (3.2)     | 8 (3.0)     | 1.05 (0.39 to 2.84)  | 0.93    |
| <b>Induction of labour</b>   | N=263       | N=271       |                      |         |
| PPH $\geq$ 500mL (%)         | 51 (19.4)   | 64 (23.6)   | 0.78 (0.51 to 1.18)  | 0.24    |
| Severe PPH $\geq$ 1000mL (%) | 9 (3.4)     | 25 (9.2)    | 0.35 (0.16 to 0.76)  | 0.008   |
| <b>Spontaneous labour</b>    | N=230       | N=243       |                      |         |
| PPH $\geq$ 500mL (%)         | 46 (20.0)   | 56 (23.7)   | 0.80 (0.52 to 1.25)  | 0.33    |
| Severe PPH $\geq$ 1000mL (%) | 10 (4.3)    | 12 (5.1)    | 0.85 (0.36 to 2.00)  | 0.71    |
